# Supplementary material
Source: PubMed Central journal article supplement (PMC6204677)
Supplement: zjm999096153s1.pdf [file zjm999096153s1.pdf]

- 1 Supplemental Table 1: Comparison of the clinical sensitivity for the detection of CIN2+ and
- 2 CIN3+ with clinical specificity for  $\leq$ CIN1 of Anyplex, hc2, and cobas in women < 30 years old.

| Test    | Clinical sensitivity for CIN2+<br>(%) | Clinical sensitivity for CIN3+<br>(%) | Clinical specificity<br>(%)           |
|---------|---------------------------------------|---------------------------------------|---------------------------------------|
| Anyplex | 96.6%<br>(28/29; 95 CI, 82.2-99.9)    | 100%<br>(16/16; 95 CI, 79.4-100)      | 78.8%<br>(160/203; 95% CI, 72.5-84.2) |
| hc2     | 96.6%<br>(28/29; 95 CI, 82.2-99.9)    | 100%<br>(16/16; 95 CI, 79.4-100)      | 77.3%<br>(157/203; 95 CI, 71.0-82.9)  |
| Cobas   | 93.1%<br>(27/29; 95 CI, 77.2-99.2)    | 100%<br>(16/16; 95 CI, 79.4-100)      | 78.7%<br>(159/202; 95 CI, 72.4-84.1)  |

4 Supplemental Table 2: Relative sensitivity and specificity of Anyplex compared to i) hc2 and ii)  
 5 cobas in women <30 years old.

|                   | Clinical<br>outcome | Relative sensitivity          | Relative specificity | $p_{McN}^a$ | $p_{Ni}^b$ |
|-------------------|---------------------|-------------------------------|----------------------|-------------|------------|
| Anyplex vs. hc2   | CIN2+               | 1.00 (0.90-1.11) <sup>c</sup> |                      | 1.000       | 0.039      |
|                   | CIN3+               | 1.00 (0.86-1.17) <sup>c</sup> |                      | 1.000       | 0.091      |
|                   | ≤CIN1               |                               | 1.02 (0.98-1.06)     | 0.5087      | 0.029      |
| Anyplex vs. cobas | CIN2+               | 1.04 (0.97-1.11) <sup>c</sup> |                      | 1.000       | 0.010      |
|                   | CIN3+               | 1.00 (0.86-1.17) <sup>c</sup> |                      | 1.000       | 0.091      |
|                   | ≤CIN1               |                               | 1.00 (0.96-1.04)     | 1.000       | 0.165      |

6 Abbreviations: <sup>a</sup> $p_{McN}$  =  $p$  value for McNemar test; <sup>b</sup> $p_{Ni}$  =  $p$  value in non-inferiority testing;

7 <sup>c</sup>confidence interval calculated with Nam-Blackwelder interval due to zero non-matched cases.
